# Supplementary material
Source: PubMed Central journal article supplement (PMC8204868)
Supplement: EMBJ-40-e105763-s002.pdf [file EMBJ-40-e105763-s002.pdf]

# Appendix

## **Transneuronal Dpr12/DIP- $\delta$ interactions facilitate compartmentalized dopaminergic innervation of *Drosophila* mushroom body axons**

Bavat Bornstein<sup>1</sup>, Hagar Meltzer<sup>1\*</sup>, Ruth Adler<sup>1</sup>, Idan Alyagor<sup>1</sup>, Victoria Berkun<sup>1</sup>, Gideon Cummings<sup>1</sup>, Fabienne Reh<sup>2</sup>, Hadas Keren-Shaul<sup>3,4</sup>, Eyal David<sup>3</sup>, Thomas Riemensperger<sup>2</sup> and Oren Schuldiner<sup>1\*#</sup>

Correspondence to: [oren.schuldiner@weizmann.ac.il](mailto:oren.schuldiner@weizmann.ac.il)  
[hagar.meltzer@weizmann.ac.il](mailto:hagar.meltzer@weizmann.ac.il)

## **Table of contents:**

|                                                                                                  |     |
|--------------------------------------------------------------------------------------------------|-----|
| List of genotypes                                                                                | 2-4 |
| Appendix Figure S1: Additional data regarding Dpr12 and DIP- $\delta$ protein localization       | 5   |
| Appendix Figure S2: MBON- $\gamma$ 3 innervation of the MB $\gamma$ -lobe in Dpr12 mutant brains | 6   |
| Appendix Table S1: EM-skeletons used for model generation                                        | 7   |
| Appendix Table S2: List of drivers used in the current study                                     | 8   |

## List of genotypes used in this study:

hsFLP is *y,w,hsFLP122*; tdT is *tdTomato*; mtdT-HA is *mtdTomato-3xHA*; 40A and G13 are FRTs on 2L and 2R respectively; R71G10 is *GMR71G10-Gal4*; R18H09 is *GMR18H09-Gal4*; R58E02 is *GMR58E02-Gal4*; R10G03 is *GMR10G03-Gal4*; R48H011 is *GMR48H011-Gal4*; G80 is *TubP-Gal80*. Males and females were used interchangeably but only the female genotype is mentioned.

### Figure 1

(C) *y, w; R71G10, UAS-mCD8-GFP/+; R71G10, UAS-Dcr-2/+*  
(D) *y, w; R71G10, UAS-mCD8-GFP/+; R71G10, UAS-Dcr-2/ TRiP.JF03210(dpr12-RNAi)*  
(E) *y, w; R71G10, UAS-mCD8-GFP/+; UAS-Cas9.C*  
(F) *y, w; R71G10, UAS-mCD8-GFP/+; UAS-Cas9.C/dpr12-gRNA*  
(G-I) *y, w; UAS-mCD8-GFP/+; R71G10/+*  
(J) *y, w; UAS-mCD8-GFP/+; R71G10/UAS-Dpr12*  
(K-M) *y, w; 40A, dpr12 $\Delta^{50-81}$ , G13/40A, dpr12 $\Delta^{50-81}$ , G13; R71G10, UAS-mCD8-GFP/+*  
(N) *y, w; 40A, dpr12 $\Delta^{50-81}$ , G13/40A, dpr12 $\Delta^{50-81}$ , G13; R71G10, UAS-mCD8-GFP/UAS-Dpr12*

### Figure 2

(A-C, G-I) *hsFLP, UAS-mCD8-GFP; Gal80, FRT40A/FRT40A; R71G10, UAS-Dcr-2/+*  
(D-F, J-L) *hsFLP, UAS-mCD8-GFP; Gal80, FRT40A/FRT40A; R71G10, UAS-Dcr-2/ TRiP.JF03210 (dpr12-RNAi)*  
(O) *y, w; UAS-mCD8-GFP/+; R18H09/+*

### Figure 3

(A-C) *y, w; Dpr12<sup>GFSTF</sup>/+*  
(D) *y, w; UAS-CD4-tdT/Dpr12<sup>GFSTF</sup>; R18H09/+*  
(E-G) *y, w;; DIP- $\delta$ <sup>GFSTF</sup>/+*  
(H) *y, w; UAS-CD4-tdT/+; DIP- $\delta$ <sup>GFSTF</sup>/R18H09*

### Figure 4

(A-C) *y, w; R71G10-QF2, QUAS-mtdT-HA/+; DIP- $\delta$ <sup>T2A-Gal4</sup>/+*  
(D) *y, w; R71G10-QF2, QUAS-mtdT-HA/UAS-DIP- $\delta$ ; DIP- $\delta$ <sup>T2A-Gal4</sup>/+*  
(E-G) *y, w; R71G10-QF2, QUAS-mtdT-HA/+; DIP- $\delta$ <sup>T2A-Gal4</sup>/DIP- $\delta$ <sup>T2A-Gal4</sup>*  
(H) *y, w; R71G10-QF2, QUAS-mtdT-HA/UAS-DIP- $\delta$ ; DIP- $\delta$ <sup>T2A-Gal4</sup>/DIP- $\delta$ <sup>T2A-Gal4</sup>*  
(J) *y, w; UAS-DIP- $\delta$ -RNAi/R71G10-QF2, QUAS-mtdT-HA; Repo-Gal4, UAS-mCD8-GFP/+*  
(K) *y, w; UAS-DIP- $\delta$ -RNAi/R71G10-QF2, QUAS-mtdT-HA; OK107-Gal4*  
(L) *C155-Gal4; UAS-DIP- $\delta$ -RNAi/R71G10-QF2, QUAS-mtdT-HA*  
(M) *y, w; UAS-DIP- $\delta$ -RNAi/R71G10-QF2, QUAS-mtdT-HA; DIP- $\delta$ <sup>T2A-Gal4</sup>/+*

### Figure 5

(A) *UAS-mCD8-RFP; R53C03-p65.AD/+; DIP- $\delta$ <sup>GFSTF</sup>/R24E12-GAL4.DBD*  
(B) *UAS-mCD8-RFP; R53C03-p65.AD/UAS-DTi; DIP- $\delta$ <sup>GFSTF</sup>/R24E12-GAL4.DBD*

(C) y, w; UAS-CD4-tdT/+; DIP- $\delta$ <sup>GFSTF</sup>/R58E02  
(D) y, w; UAS-CD4-tdT/UAS-DTi; DIP- $\delta$ <sup>GFSTF</sup>/R58E02  
(E-G) hsFLP, UAS-mCD8-GFP; Gal80, FRT40A/FRT40A; *DIP- $\delta$ <sup>T2A-Gal4</sup>/+*

### Figure 6

(A-D) y, w; Dpr12<sup>GFSTF</sup>/+; *DIP- $\delta$ <sup>T2A-Gal4</sup>/DIP- $\delta$ <sup>T2A-Gal4</sup>*  
(E-H) y, w; 40A, *dpr12 $\Delta$ <sup>50-81</sup>*, G13/40A, *dpr12 $\Delta$ <sup>50-81</sup>*, G13; DIP- $\delta$ <sup>GFSTF</sup>/+  
(I) y, w; Dpr12<sup>GFSTF</sup>/+; UAS-DIP- $\delta$ -T2A-tdT/+  
(J) y, w; Dpr12<sup>GFSTF</sup> /R30G08-p65.AD; R48B03-GAL4.DBD/ UAS-DIP- $\delta$ -T2A-tdT

### Figure 7

(A) y, w; 40A, *dpr12 $\Delta$ <sup>50-81</sup>*, G13/+; R10G03/UAS-mCD8-GFP  
(B) y, w; 40A, *dpr12 $\Delta$ <sup>50-81</sup>*, G13/40A, *dpr12 $\Delta$ <sup>50-81</sup>*, G13; R10G03/UAS-mCD8-GFP  
(C) y, w; 40A, *dpr12 $\Delta$ <sup>50-81</sup>*, G13/+; R48H011/UAS-mCD8-GFP  
(D) y, w; 40A, *dpr12 $\Delta$ <sup>50-81</sup>*, G13/40A, *dpr12 $\Delta$ <sup>50-81</sup>*, G13; R48H011/UAS-mCD8-GFP  
(E) y, w; 40A, *dpr12 $\Delta$ <sup>50-81</sup>*, G13/+; R18H09/UAS-mCD8-GFP  
(F) y, w; 40A, *dpr12 $\Delta$ <sup>50-81</sup>*, G13/40A, *dpr12 $\Delta$ <sup>50-81</sup>*, G13; R18H09/UAS-mCD8-GFP  
(G) w<sup>1118</sup>  
(H) w<sup>1118</sup>; 40A, *dpr12 $\Delta$ <sup>50-81</sup>*, G13/40A, *dpr12 $\Delta$ <sup>50-81</sup>*, G13

### Figure 8

(A) y, w; R71G10-QF2, QUAS-mtdT-HA/+; *DIP- $\delta$ <sup>T2A-Gal4</sup>/DIP- $\delta$ <sup>1-119</sup>*  
(B) y, w; R71G10-QF2, QUAS-mtdT-HA/+; *DIP- $\delta$ <sup>T2A-Gal4</sup>/DIP- $\delta$ <sup>1-119</sup>*, UAS-DIP- $\alpha$   
(C) y,w; Dpr12<sup>GFSTF</sup>/+; *DIP- $\delta$ <sup>1-119</sup>*, UAS-DIP- $\alpha$ /+  
(D) y,w; Dpr12<sup>GFSTF</sup>/+; *DIP- $\delta$ <sup>1-119</sup>*, UAS-DIP- $\alpha$ /DIP- $\delta$ <sup>T2A-Gal4</sup>  
(E) y, w; 40A, *dpr12 $\Delta$ <sup>50-81</sup>*, G13/40A, *dpr12 $\Delta$ <sup>50-81</sup>*, G13; *DIP- $\delta$ <sup>T2A-Gal4</sup>*/ UAS-mtdT  
(F) y, w; 40A, *dpr12 $\Delta$ <sup>50-81</sup>*, G13/40A, *dpr12 $\Delta$ <sup>50-81</sup>*, G13; *DIP- $\delta$ <sup>T2A-Gal4</sup>*/ UAS-DIP- $\alpha$ -T2A-tdT

### Figure EV1

(A)  
y, w; R71G10, UAS-mCD8-GFP/+; R71G10, UAS-Dcr-2/ TRiP.JF03306(Dpr5-RNAi)  
y, w; UAS-mCD8-GFP/+; R71G10/ TRiP.JF03172 (Dpr8-RNAi)  
y, w; UAS-mCD8-GFP/+; R71G10/ TRiP.HMS00288 (Dpr9-RNAi)  
y, w; R71G10, UAS-mCD8-GFP/+; R71G10, UAS-Dcr-2/ TRiP.JF02920 (Dpr10-RNAi)  
y, w; R71G10, UAS-mCD8-GFP/+; R71G10, UAS-Dcr-2/ TRiP.JF03210(Dpr12-RNAi)  
y, w; UAS-mCD8-GFP/+; R71G10/ TRiP.GL01238 (Dpr17-RNAi)  
y, w; R71G10, UAS-mCD8-GFP/+; R71G10, UAS-Dcr-2/ TRiP.JF03283}attP2 (Dpr18-RNAi)  
y, w; UAS-mCD8-GFP/+; R71G10/ TRiP.JF02923 (Dpr20-RNAi)  
(D)  
y, w; 40A, *Dpr12 $\Delta$ <sup>50-81</sup>*, G13/40A, *Dpr12 $\Delta$ <sup>50-81</sup>*, G13; R71G10, UAS-mCD8-GFP/+  
y, w; 40A, *Dpr12 $\Delta$ <sup>50-81</sup>*, G13/40A, *Dpr12 $\Delta$ <sup>50-81</sup>*, G13; R71G10, UAS-mCD8-GFP/+  
y, w; 40A, *Dpr12 $\Delta$ <sup>50-81</sup>*, G13/40A, *Dpr12 $\Delta$ <sup>50-81</sup>*, G13; R71G10, UAS-mCD8-GFP/+  
y, w; UAS-mCD8-GFP/+; R71G10/+

### Figure EV2

- (A) hsFLP, UAS-mCD8-GFP; Gal80, FRT40A/FRT40A; R71G10, UAS-Dcr-2/+  
 (B) hsFLP, UAS-mCD8-GFP; Gal80, FRT40A/FRT40A; R71G10, UAS-Dcr-2/  
 TRiP.JF03210 (Dpr12-RNAi)  
 (D) y, w; UAS-mCD8-GFP/R30G08-p65.AD; R48B03-GAL4.DBD/ +  
 (E) y, w; UAS-mCD8-GFP/+; R18H09/ +  
 (F) y, w; UAS-mCD8-GFP/+; R48H011/+

### Figure EV3

- (C-D) y, w; R71G10-QF2, QUAS-mtdT-HA/+; *DIP- $\delta^{T2A-Gal4}$* /*DIP- $\delta^{1-119}$*   
 (E) y, w; R71G10-QF2, QUAS-mtdT-HA/UAS-*DIP- $\delta$* ; *DIP- $\delta^{T2A-Gal4}$* /*DIP- $\delta^{T2A-Gal4}$*   
 (F) C155-Gal4; UAS-Cas9.P2/+  
 (G) C155-Gal4; UAS-Cas9.P2/TKO.GS02451(*gRNA DIP- $\delta$* )  
 (H) y, w; R71G10, UAS-mCD8-GFP/ +; UAS-Cas9.C/+  
 (I) y, w; R71G10, UAS-mCD8-GFP/ TKO.GS02451(*gRNA DIP- $\delta$* ); UAS-Cas9.C/+

### Figure EV4

- (A-C) y, w; QUAS-GFP, UAS-mtdT-HA/UAS-tdT; R58E02/R58E02-QF2  
 (D-F) y, w; R71G10-QF2, QUAS-mtdT-HA/+; *DIP- $\delta^{T2A-Gal4}$* /+

### Figure EV5

- (A) y, w; 40A, *dpr12 $\Delta^{50-81}$* , G13/+; R10G03/UAS-mCD8-GFP  
 (B) y, w; 40A, *dpr12 $\Delta^{50-81}$* , G13/40A, *dpr12 $\Delta^{50-81}$* , G13; R10G03/UAS-mCD8-GFP  
 (D) y, w; 40A, *dpr12 $\Delta^{50-81}$* , G13/+; R48H011/UAS-mCD8-GFP  
 (E) y, w; 40A, *dpr12 $\Delta^{50-81}$* , G13/40A, *dpr12 $\Delta^{50-81}$* , G13; R48H011/UAS-mCD8-GFP  
 (G) y, w; 40A, *dpr12 $\Delta^{50-81}$* , G13/+; R18H09/UAS-mCD8-GFP  
 (H) y, w; 40A, *dpr12 $\Delta^{50-81}$* , G13/40A, *dpr12 $\Delta^{50-81}$* , G13; R18H09/UAS-mCD8-GFP

### Figure EV6

- (A) y, w; R71G10-QF2, QUAS-mtdT-HA/+; *DIP- $\delta^{1-119}$* /*DIP- $\delta^{1-119}$*   
 (B) y, w; R71G10-QF2, QUAS-mtdT-HA/+; *DIP- $\delta^{1-119}$* /*DIP- $\delta^{1-119}$* , UAS-DIP- $\alpha$   
 (C) y, w; R71G10-QF2, QUAS-mtdT-HA/+; *DIP- $\delta^{T2A-Gal4}$* /*DIP- $\delta^{T2A-Gal4}$*   
 (D) y, w; R71G10-QF2, QUAS-mtdT-HA/UAS-FasII; *DIP- $\delta^{T2A-Gal4}$* /*DIP- $\delta^{T2A-Gal4}$*

### Appendix Figure S1

- (A) y, w; Dpr12<sup>GFSTF</sup>/+  
 (B) y, w;; DIP- $\delta$ <sup>GFSTF</sup>/+  
 (C) y, w; Dpr12<sup>GFSTF</sup>/+; *DIP- $\delta^{T2A-Gal4}$* /*DIP- $\delta^{T2A-Gal4}$*   
 (D) y, w; 40A, *dpr12 $\Delta^{50-81}$* , G13/40A, *dpr12 $\Delta^{50-81}$* , G13; DIP- $\delta$ <sup>GFSTF</sup>/+  
 (E) y, w; UAS-CD4-tdT/Dpr12<sup>GFSTF</sup>; R18H09/+  
 (F) y, w; UAS-CD4-tdT/+; DIP- $\delta$ <sup>GFSTF</sup>/R18H09

### Appendix Figure S2

- (A) y,w; 40A, *dpr12 $\Delta^{50-81}$* , G13/+; R94B10-GAL4.DBD, R52G04-p65.AD/ UAS-mCD8-GFP  
 (B) y,w; 40A, *dpr12 $\Delta^{50-81}$* , G13/40A, *dpr12 $\Delta^{50-81}$* , G13; R94B10-GAL4.DBD, R52G04-p65.AD/ UAS-mCD8-GFP

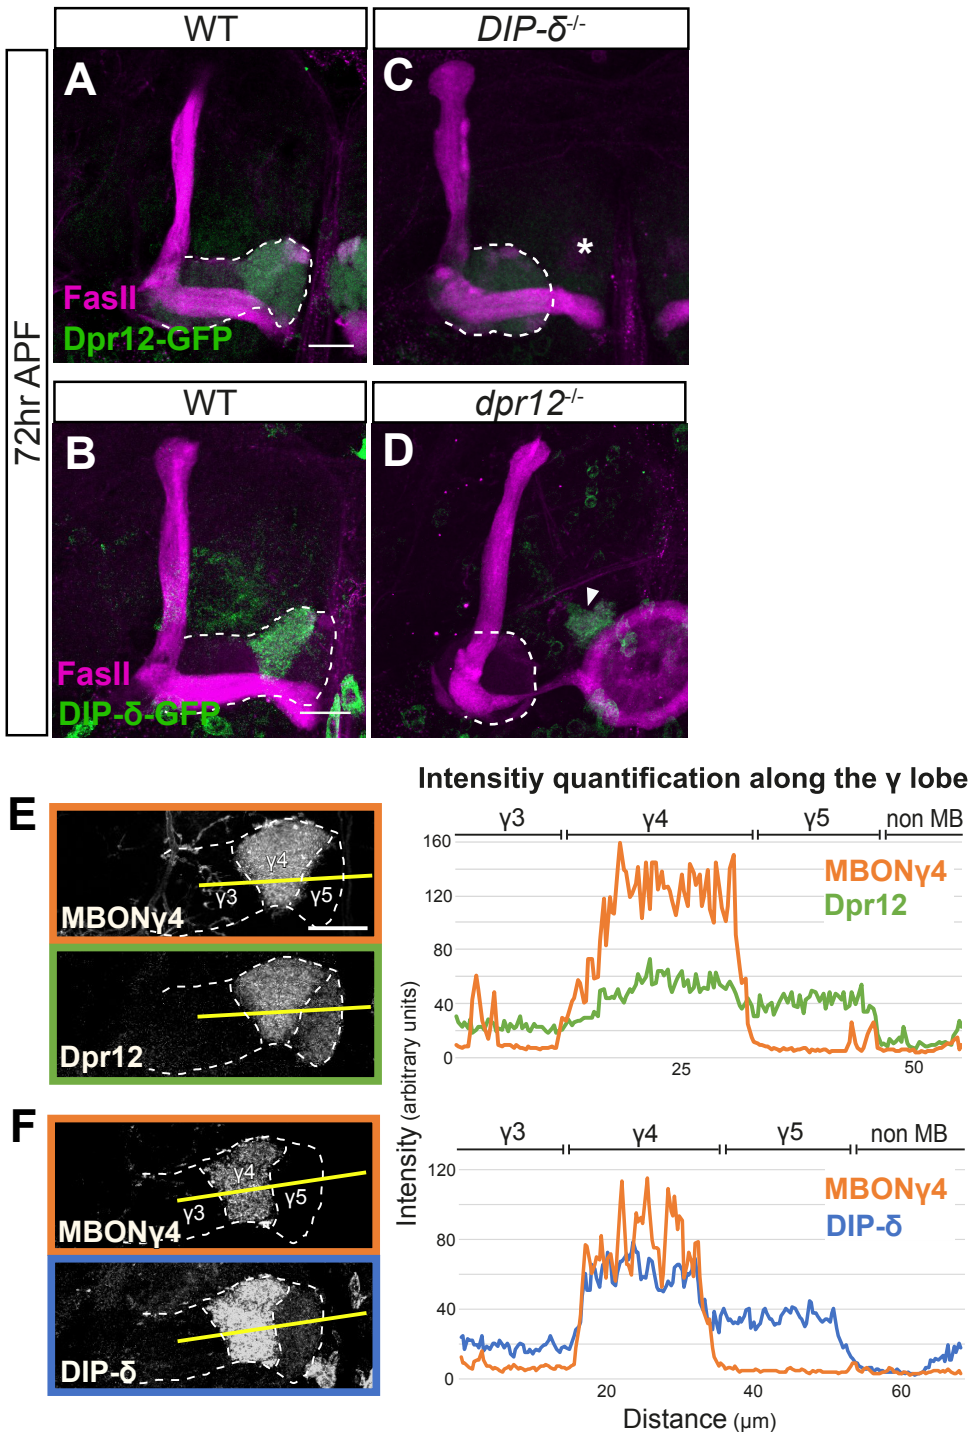

**Appendix figure S1. Additional data regarding Dpr12 and DIP- $\delta$  protein localization, related to Figures 3 and 6.**

(A-D) Confocal z-projections of brains expressing either MiMIC mediated Dpr12<sup>GFSTF</sup> (Dpr12-GFP; A,C) or DIP- $\delta$ <sup>GFSTF</sup> (DIP- $\delta$ -GFP; B,D) fusion proteins, in either WT (A-B), *DIP- $\delta$ <sup>T2A-Gal4</sup>* homozygous mutant (C) or *dpr12 <sup>$\Delta$ 50-81</sup>* homozygous mutant (D) animals at 72hr APF. Green is GFP, magenta is FasII. Dashed line depicts the medial  $\gamma$ -lobe, as determined by FasII staining. Asterisk demarcates the distal part of the lobe; arrowhead demarcates DIP- $\delta$  expression at the distal part of the lobe. Scale bar is 20 $\mu$ m.

(E-F) Intensity quantification of the indicated channels in the confocal z-projections that appear in Figure 3D (for E) and Figure 3H (for F). Intensity (arbitrary units) was quantified along a defined line that crosses the  $\gamma$  lobe from  $\gamma$ 3 until it exits the MB (marked in yellow; distance is shown in  $\mu$ m). The MBON- $\gamma$ 4 channel (GMR18H09-Gal4>CD4-tdT) is shown in orange (E, F), Dpr12-GFP in green (E) and DIP- $\delta$ -GFP in blue (F). The rough division to  $\gamma$ -lobe zones is indicated above the graphs. Scale bar is 20 $\mu$ m.

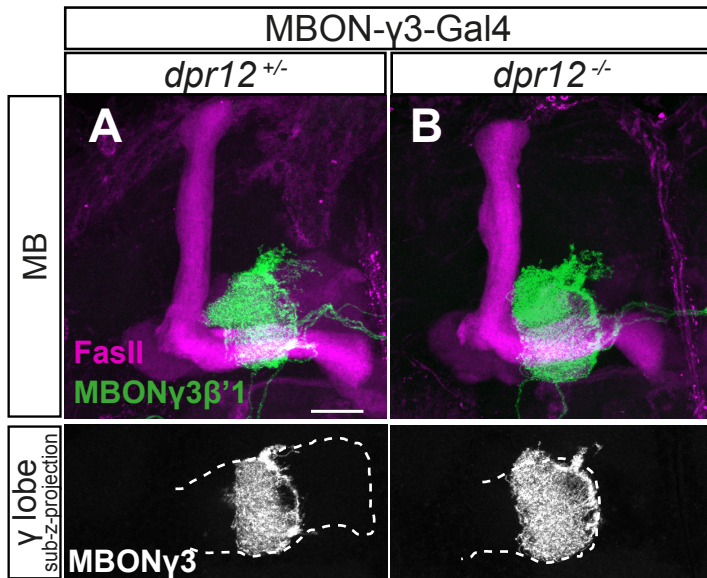

**Appendix figure S2. MBON- $\gamma$ 3 innervation of the MB  $\gamma$ -lobe in Dpr12 mutant brains, related to Figure 7.**

(A-B) Confocal z-projections of *dpr12* <sup>$\Delta$ 50-81</sup> heterozygous (A) or homozygous (B) mutant brains expressing membrane-bound GFP (CD8-GFP) driven by MB083C (MBON $\gamma$ 3-Gal4) that is expressed in MBON $\gamma$ 3 $\beta$ '1 (MBON-09). The greyscale channels are sub-z-projections comprised of slices restricted to the  $\gamma$ -lobe (which is outlined in white).

Green and grey are CD8-GFP, magenta is FasII. Scale bar is 20 $\mu$ m.

| Color | Type         | Name   | Projection Pattern  | <i>neuPrint</i> Body ID |
|-------|--------------|--------|---------------------|-------------------------|
| ●     | γ-KC         | KCym   | Medial γ-lobe       | 415511327               |
| ●     |              | KCym   | Medial γ-lobe       | 415835070               |
| ●     |              | KCym   | Medial γ-lobe       | 415835178               |
| ●     |              | KCym   | Medial γ-lobe       | 415848228               |
| ●     |              | KCym   | Medial γ-lobe       | 415852518               |
| ●     |              | KCym   | Medial γ-lobe       | 415908516               |
| ●     |              | KCym   | Medial γ-lobe       | 416189410               |
| ●     |              | KCym   | Medial γ-lobe       | 416189500               |
| ●     |              | KCym   | Medial γ-lobe       | 416598862               |
| ●     |              | KCym   | Medial γ-lobe       | 415494049               |
| ●     | γ5 PAM-DAN   | PAM01  | γ5 compartment      | 925799233               |
| ●     |              | PAM01  | γ5 compartment      | 1202397143              |
| ●     |              | PAM01  | γ5 compartment      | 5812982779              |
| ●     |              | PAM15  | γ5β'2a compartment  | 5813096699              |
| ●     | γ4 PAM-DAN   | PAM08  | γ4 compartment      | 580317662               |
| ●     |              | PAM08  | γ4 compartment      | 988852391               |
| ●     | γ4>γ1γ2 MBON | MBON05 | γ4>γ1γ2 compartment | 799586652               |
| ●     | γ5β'2a MBON  | MBON01 | γ5β'2a compartment  | 612371421               |

**Appendix Table S1. EM-skeletons used for model generation.**

A list of the cell types, names, projection patterns, color coding and *neuPrint* IDs for all the EM-based skeletons used to construct the models in Figure 1P and Movie EV1 (see methods for additional details).



| Driver                 |                | Expressing cells                                                     | Expression during development |                                                  |       | Source                                                |
|------------------------|----------------|----------------------------------------------------------------------|-------------------------------|--------------------------------------------------|-------|-------------------------------------------------------|
| Name in manuscript     | Formal name    |                                                                      | Larva                         | Pupa                                             | Adult |                                                       |
| <b>γ-Gal4</b>          | R71G10-Gal4    | γ-KCs consistently<br>α/β-KCs stochastically                         | ✓                             | ✓                                                | ✓     | Chr. III: Bl. #39604<br>Chr. II: Alyagor et al., 2018 |
| <b>γ-QF2</b>           | R71G10-QF2     | γ-KCs consistently<br>α/β-KCs stochastically                         | ✓                             | ✓                                                | ✓     | This study                                            |
| <b>DIP-δ-Gal4</b>      | DIP-δ-T2A-Gal4 | DIP-δ-expressing cells<br>including PAM-DANs<br>targeting γ4/5 zones | ✓                             | ✓                                                | ✓     | This study                                            |
| <b>PAM-DAN-Gal4</b>    | R58E02-Gal4    | All PAM-DANs                                                         | pPAMs*                        | After 48hr APF                                   | ✓     | BDSC #41347                                           |
| <b>PAM-DAN-γ3-Gal4</b> | MB441B         | PAM-DANs targeting γ3                                                | X                             | ND                                               | ✓     | BDSC #68251                                           |
| <b>PAM-DAN-γ4-Gal4</b> | R10G03         | PAM-DANs targeting γ4                                                | ND                            | After 72hr APF                                   | ✓     | BDSC #48271                                           |
| <b>PAM-DAN-γ5-Gal4</b> | R48H11         | PAM-DANs targeting γ5                                                | ND                            | After 72hr APF                                   | ✓     | BDSC #50396                                           |
| <b>MBON-γ4-Gal4</b>    | R18H09         | MBON-γ4>γ1γ2 (MBON-05)                                               | X                             | Not at 24hr APF<br>(ND for other<br>time points) | ✓     | BDSC #48830                                           |
| <b>MBON-γ4-Gal4</b>    | MB298B         | MBON-γ4>γ1γ2 (MBON-05)                                               | ND                            | After 24hr APF                                   | ✓     | BDSC #68309                                           |
| <b>MBON-γ3-Gal4</b>    | MB083C         | MBON-γ3β'1 (MBON-09)                                                 | ND                            | ND                                               | ✓     | BDSC #68287                                           |
| <b>Pan-Glia-Gal4</b>   | Repo-Gal4      | All glia                                                             | ✓                             | ✓                                                | ✓     | BDSC #7415                                            |
| <b>Pan-KC-Gal4</b>     | OK107-Gal4     | All KCs (γ, α/β and α'/β')                                           | ✓                             | ✓                                                | ✓     | BDSC #854                                             |
| <b>Pan-Neuron-Gal4</b> | C155-Gal4      | All neurons                                                          | ✓                             | ✓                                                | ✓     | BDSC #458                                             |

**Appendix Table S2. List of drivers used in the current study.**

The driver name (in the manuscript and formally), the cells in which it is expressed, and expression throughout development are depicted. ND; not determined. \*pPAMs are primary-PAMs which are different from the adult PAM-DANs (data not shown).
