# Supplementary material
Source: PubMed Central journal article supplement (PMC8204868)
Supplement: EMBJ-40-e105763-s009.pdf [file EMBJ-40-e105763-s009.pdf]

## Expanded View Figures

### Figure EV1. Knockdown of *dpr12* results in regrowth phenotype and description of *Dpr12* alleles used in the study, related to Fig 1.

- A Left: Graphs depicting the normalized RNA expression levels of selected Dprs in WT  $\gamma$ -KCs (black), and in  $\gamma$ -KCs expressing EcR<sup>DN</sup> (green) or UNF-RNAi (blue). \* $P < 0.05$ ; Error bars indicate SEM; units on the y-axis are arbitrary. Right: Confocal z-projections of adult  $\gamma$ -KCs expressing RNAi transgenes as indicated labeled with membrane-bound GFP (mCD8-GFP; CD8) driven by the  $\gamma$ -specific Gal4 driver R71G10-Gal4 ( $\gamma$ -Gal4). Note that while R71G10 is consistently expressed in  $\gamma$ -KCs, it is also expressed in  $\alpha/\beta$ -KCs in a stochastic manner.
- B A schematic representation of the *Dpr12* locus showing introns (black line) and coding and non-coding exons (red and gray, respectively). The location of *Dpr12* gRNA (arrow), *dpr12* <sup>$\Delta$ 50-81</sup> mutation (arrow), *dpr12* RNAi<sup>IF03210</sup> (black lines connected with dashed lines), and MiMIC<sup>M101695</sup> (arrowhead) is indicated. SA and SD are splice acceptor and donor sites, respectively. Recombination-mediated cassette exchange was used to transform *Dpr12*<sup>M101695</sup> into *Dpr12*<sup>GFSTF</sup>.
- C A schematic representation of *Dpr12* protein variants. Signal peptide (SP), Immunoglobulin (Ig), transmembrane (TM), and GPI anchor (GPI).
- D Ranking of regrowth: Confocal z-projections of adult  $\gamma$ -KCs labeled with membrane-bound GFP (mCD8-GFP; CD8) driven by the  $\gamma$ -specific Gal4 driver GMR71G10-Gal4 ( $\gamma$ -Gal4). Representative images of the regrowth defect severity (1 = strong, 2 = intermediate, 3 = weak, 4 = WT) described in Fig 10. The arrowhead demarcates an unusually short  $\beta$ -lobe; morphologically abnormal  $\beta$ -lobes (either short, thin or absent) appear in approximately 40% of either *dpr12* or *DIP- $\delta$*  homozygous mutant brains. Since  $\beta$ -lobe morphology is rescued by overexpressing a UAS-*Dpr12* transgene within  $\gamma$ KCs, it is most likely a non-cell-autonomous defect, which is beyond the scope of this study. Asterisk demarcates the distal tip of the  $\gamma$ -lobe. Green is CD8-GFP; magenta is FasII staining. Scale bar is 20  $\mu$ m.

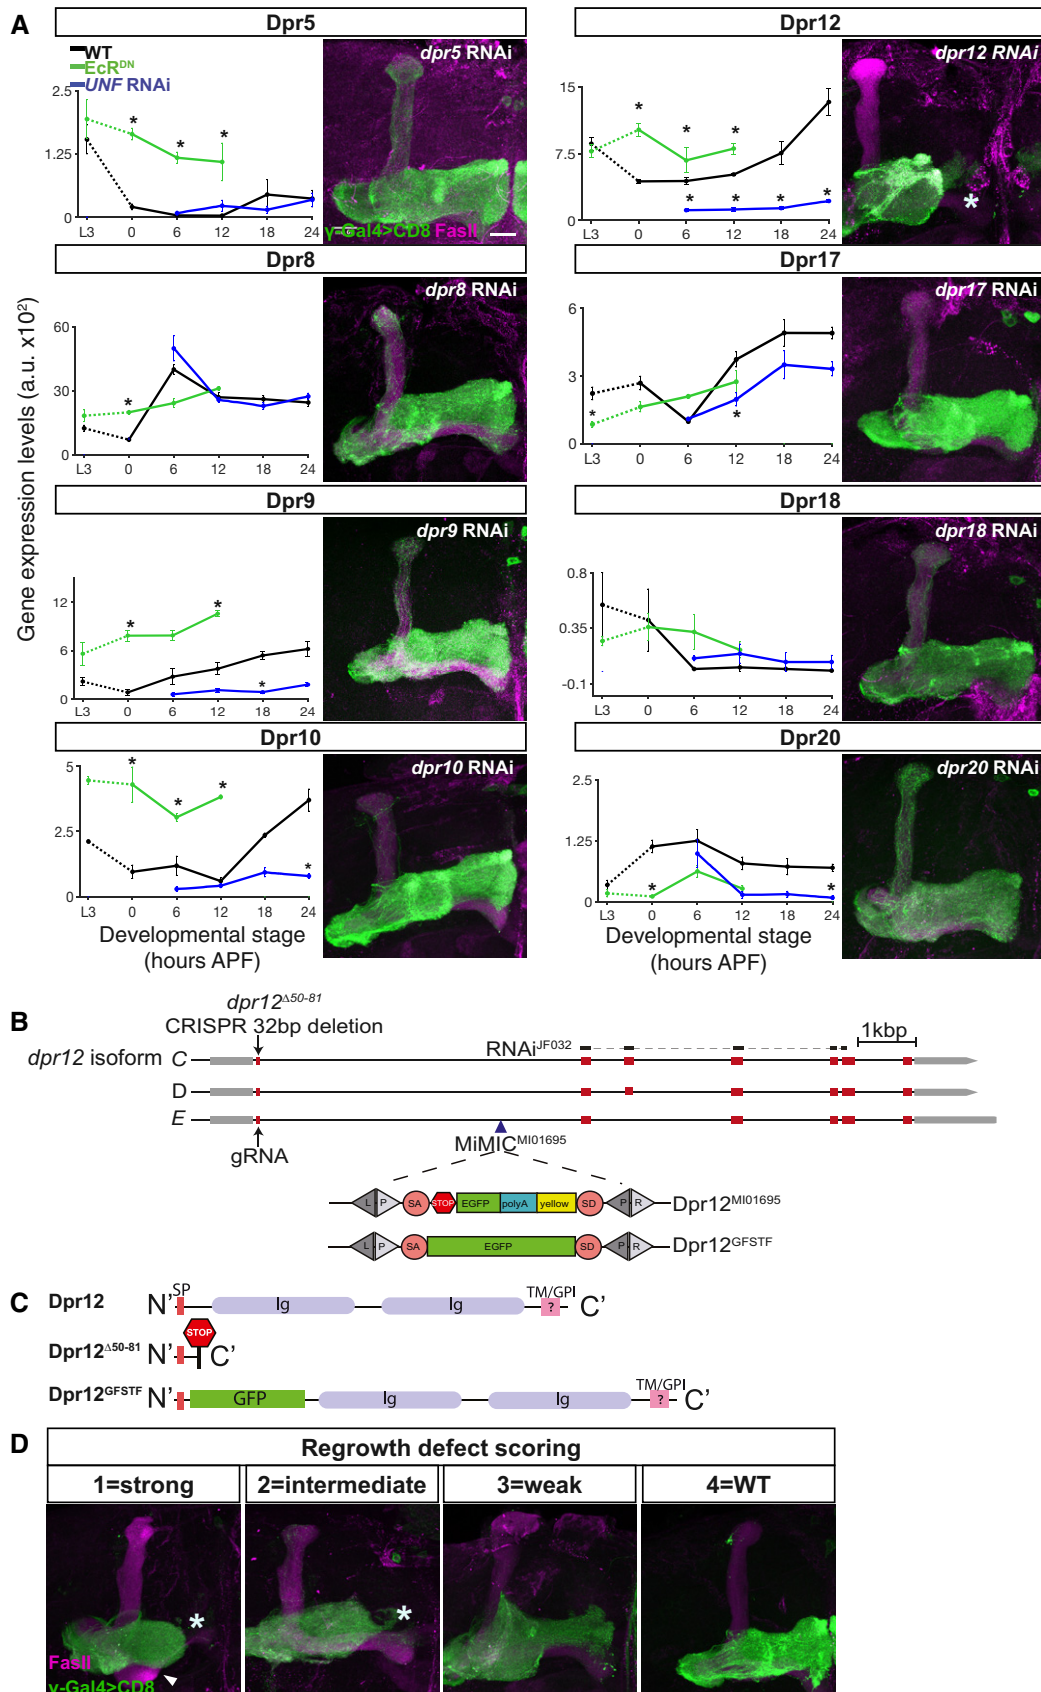

Figure EV1.

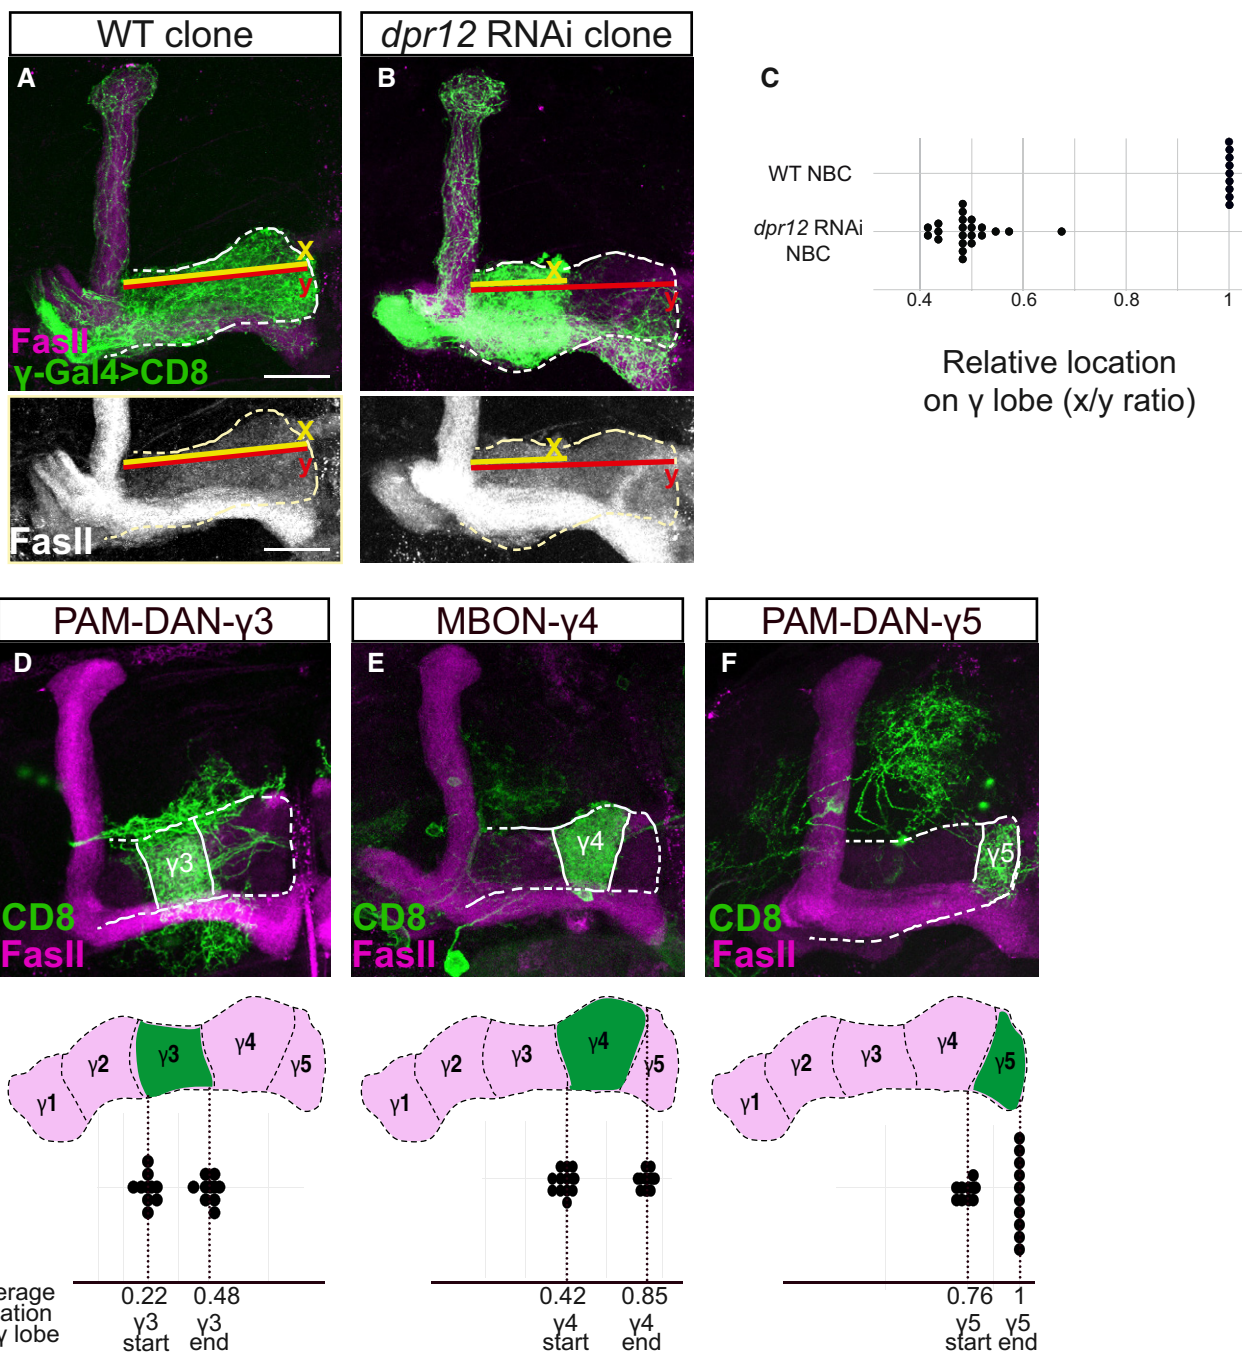

**Figure EV2. Measurements of  $\gamma$ -axon outgrowth, related to Fig 2.**

A, B Confocal z-projections of WT (A) and *dpr12* RNAi (B) MARCM neuroblast clones (NBC) labeled with membrane-bound GFP (mCD8-GFP; CD8) driven by the  $\gamma$ -specific Gal4 driver GMR71G10-Gal4 ( $\gamma$ -Gal4). y (red) represents the length of the entire  $\gamma$ -lobe as indicated; x (yellow) represents the extent of clonal  $\gamma$ -axon outgrowth.

C Measurements of the x/y ration as depicted in (A, B). While WT NBC always extends up to the end of the lobe, *dpr12* RNAi NBC stops at about midway (x/y ratio of  $0.48 \pm 0.05$ ).

D–F Top: Confocal z-projections of PAM-DAN- $\gamma$ 3 (D, MB441B), MBON- $\gamma$ 4 >  $\gamma$ 1 $\gamma$ 2 (E, R18H09), and PAM-DAN- $\gamma$ 5 (F, R48H11) Gal4s driving the expression of mCD8-GFP (CD8). Bottom: start and end of the indicated zone is superimposed on a schematic representation of the adult  $\gamma$  lobe compartments. (D)  $\gamma$ 3 zone begins at x/y ratio of  $0.22 \pm 0.03$  and ends at  $0.48 \pm 0.03$ . (E)  $\gamma$ 4 zone begins at x/y ratio of  $0.42 \pm 0.04$  and ends at  $0.85 \pm 0.03$ . (F)  $\gamma$ 5 zone begins at x/y ratio of  $0.76 \pm 0.03$  and ends at a mean ratio of 1. Green is CD8-GFP; magenta and white represent FasII. Scale bar is 20  $\mu$ m.

**Figure EV3. Description of *DIP-δ* alleles used in the study and additional *DIP-δ* perturbation phenotypes, related to Fig 4.**

- A A schematic representation of the *DIP-δ* locus showing introns (black line) and coding and non-coding exons (red and gray, respectively). The location of *DIP-δ* gRNA, *DIP-δ*<sup>1-119</sup> mutation, *DIP-δ* RNAi, and MiMIC<sup>M108287</sup> is indicated. SA and SD are splice acceptor and donor sites, respectively. Recombination-mediated cassette exchange was used to transform *DIP-δ*<sup>M108287</sup> into *DIP-δ*<sup>GFSF</sup> and *DIP-δ*<sup>T2A-Gal4</sup>.
- B A schematic description of *DIP-δ* protein variants. Signal peptide (SP), Immunoglobulin (Ig), and GPI anchor (GPI).
- C–E Confocal z-projections of *DIP-δ* transheterozygotes (*DIP-δ*<sup>T2A-Gal4/1-119</sup>) at L3 (C; *n* = 20/20) and adult (D; *n* = 12/12, E; *n* = 22/23), in which  $\gamma$  neurons were marked by expressing membrane-bound tandem tomato (mtdT-HA) driven by the  $\gamma$ -specific QF2 driver GMR71G10-QF2 ( $\gamma$ -QF2). In *DIP-δ* transheterozygotes, as in homozygous mutants (see Fig 4),  $\gamma$ -KCs do not extend into the distal end of the lobe. Expression of *DIP-δ* in *DIP-δ*<sup>+</sup> cells (E) rescues the growth defect present in *DIP-δ*<sup>T2A-Gal4/1-119</sup> brains. Green and white represent mtdT-HA; magenta represents FasII staining.
- F–I Confocal z-projections of brains expressing UAS-Cas9 alone (F, H) or together with *DIP-δ*-gRNA (G, I). *DIP-δ* knockout by tsCRISPR in all postmitotic neurons (G; *n* = 22/24) resulted in a defect in  $\gamma$ 4/5 innervation by  $\gamma$ -axons, while *DIP-δ* knockout by tsCRISPR in  $\gamma$ -KCs (I; *n* = 28/28) did not affect  $\gamma$ -axon regrowth. Expression of Cas9 alone (F, *n* = 10/10; H, *n* = 14/14) did not affect  $\gamma$ -axon regrowth. White represents FasII staining.

Data information: Scale bar is 20  $\mu$ m.

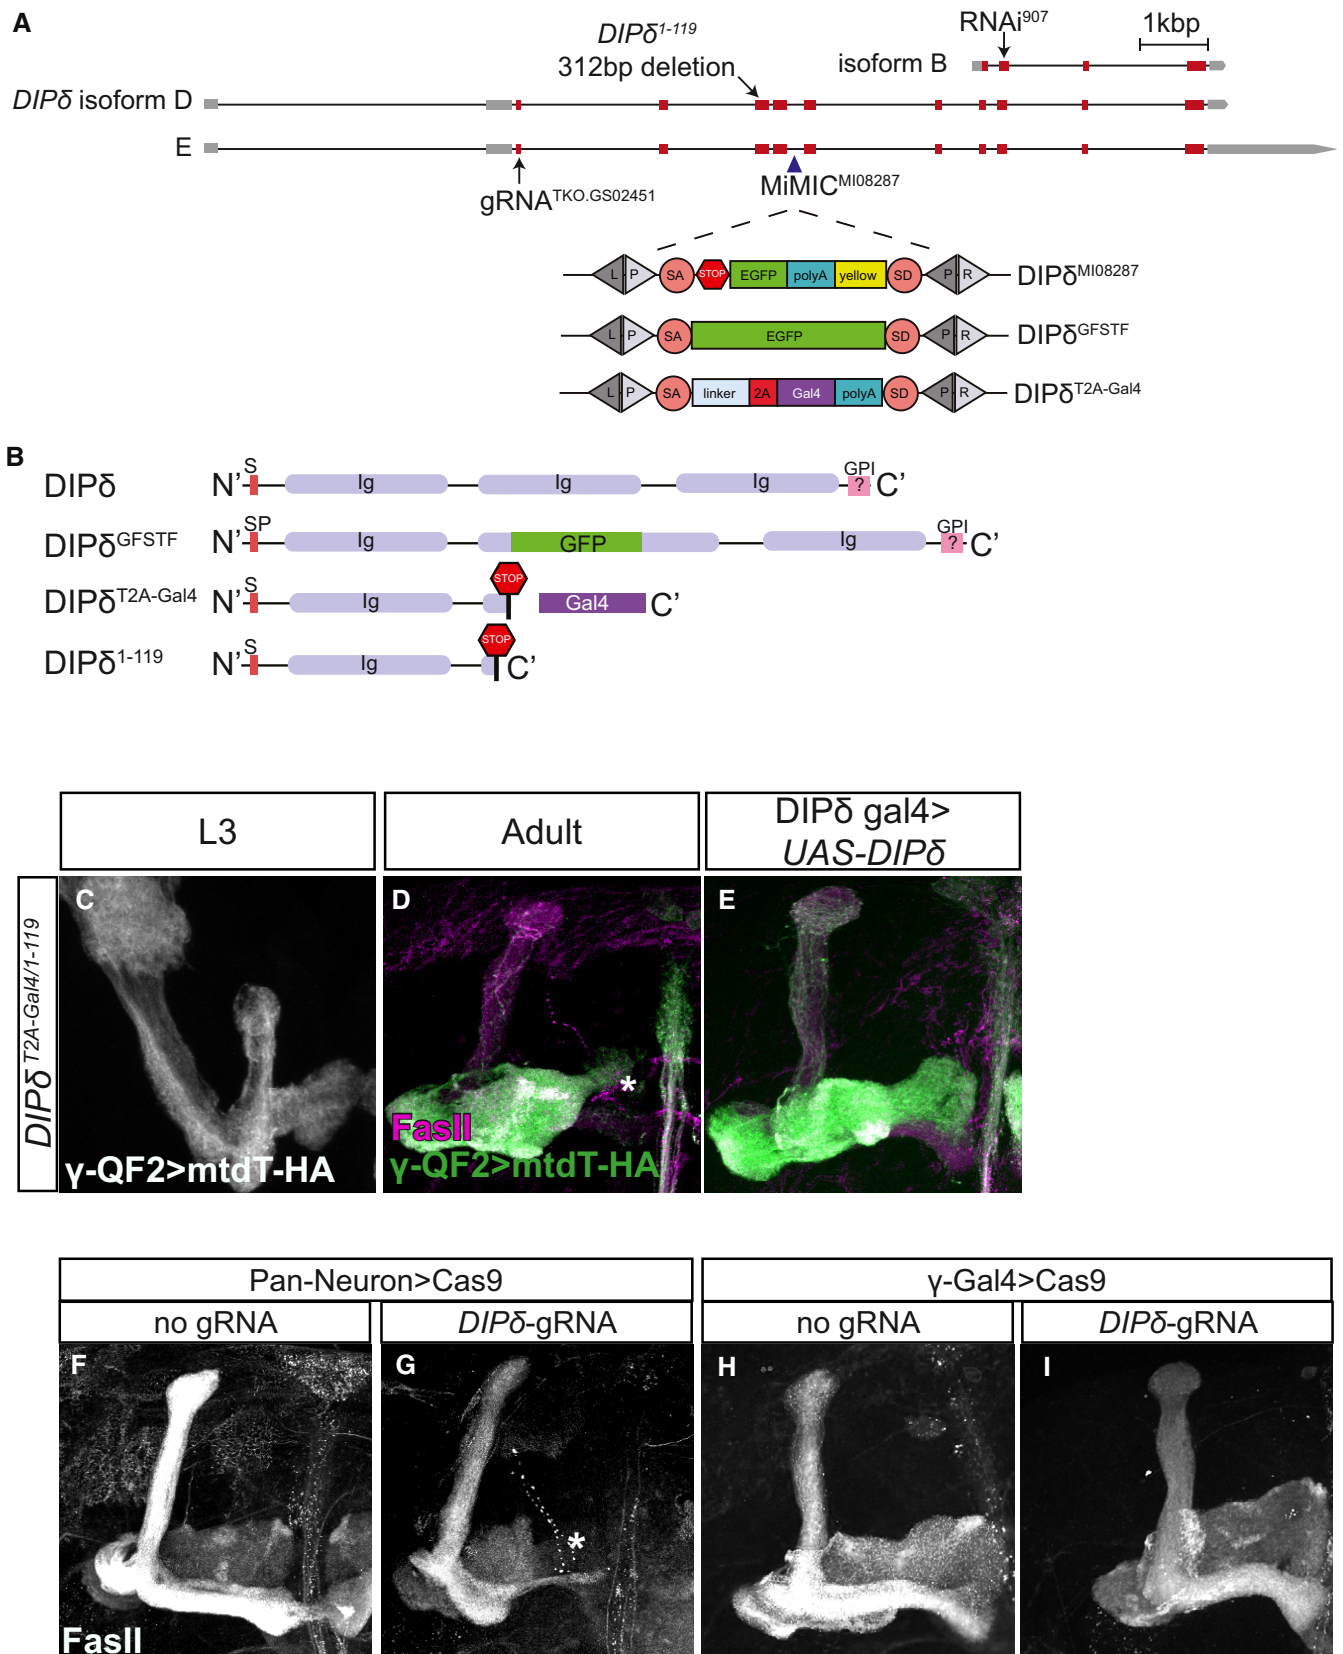

Figure EV3.

**Figure EV4. Characterization of PAM-DAN and DIP- $\delta$  Gal4s, related to Fig 5.**

- A–C Confocal z-projections of the cell body region of the PAM-DAN cluster demonstrating the expression of membrane-bound tandem tomato (CD4-tdT; CD4) driven by *DIP- $\delta^{T2A-Gal4}$*  (DIP- $\delta$ -Gal4) in addition to GFP driven by the PAM-DAN specific QF2 driver GMR58E02-QF2 (PAM-QF2). The PAM-QF2 driver is not expressed at 24 h APF (A,  $n = 12$ ), starts to be expressed at 48 h APF (B,  $n = 10$ ) and fully expressed and localized with DIP- $\delta$ -Gal4 in adult (C,  $n = 14$ ).
- D–F Confocal z-projections of heterozygous brains (*DIP- $\delta^{+T2A-Gal4}$* ) in which DIP- $\delta$  positive neurons were labeled by membrane-bound GFP (mCD8-GFP; CD8) driven by DIP- $\delta$ -Gal4.  $\gamma$ -KCs were marked by expressing membrane-bound tandem tomato (mtdT-HA) driven by the  $\gamma$ -specific QF2 driver GMR71G10-QF2 ( $\gamma$ -QF2). Bottom: High magnification images as demarcated by dashed boxes in top panels, of sub-z-projections restricted to slices that contain the  $\gamma$ -lobe.

Data information: Dashed outline demarcates  $\gamma$ -lobe as depicted by FasII staining.  $\gamma$ 4/5 zones are indicated in adult. (D),  $n = 20$ ; (E),  $n = 16$ ; (F),  $n = 26$ . Scale bar is 20  $\mu$ m.

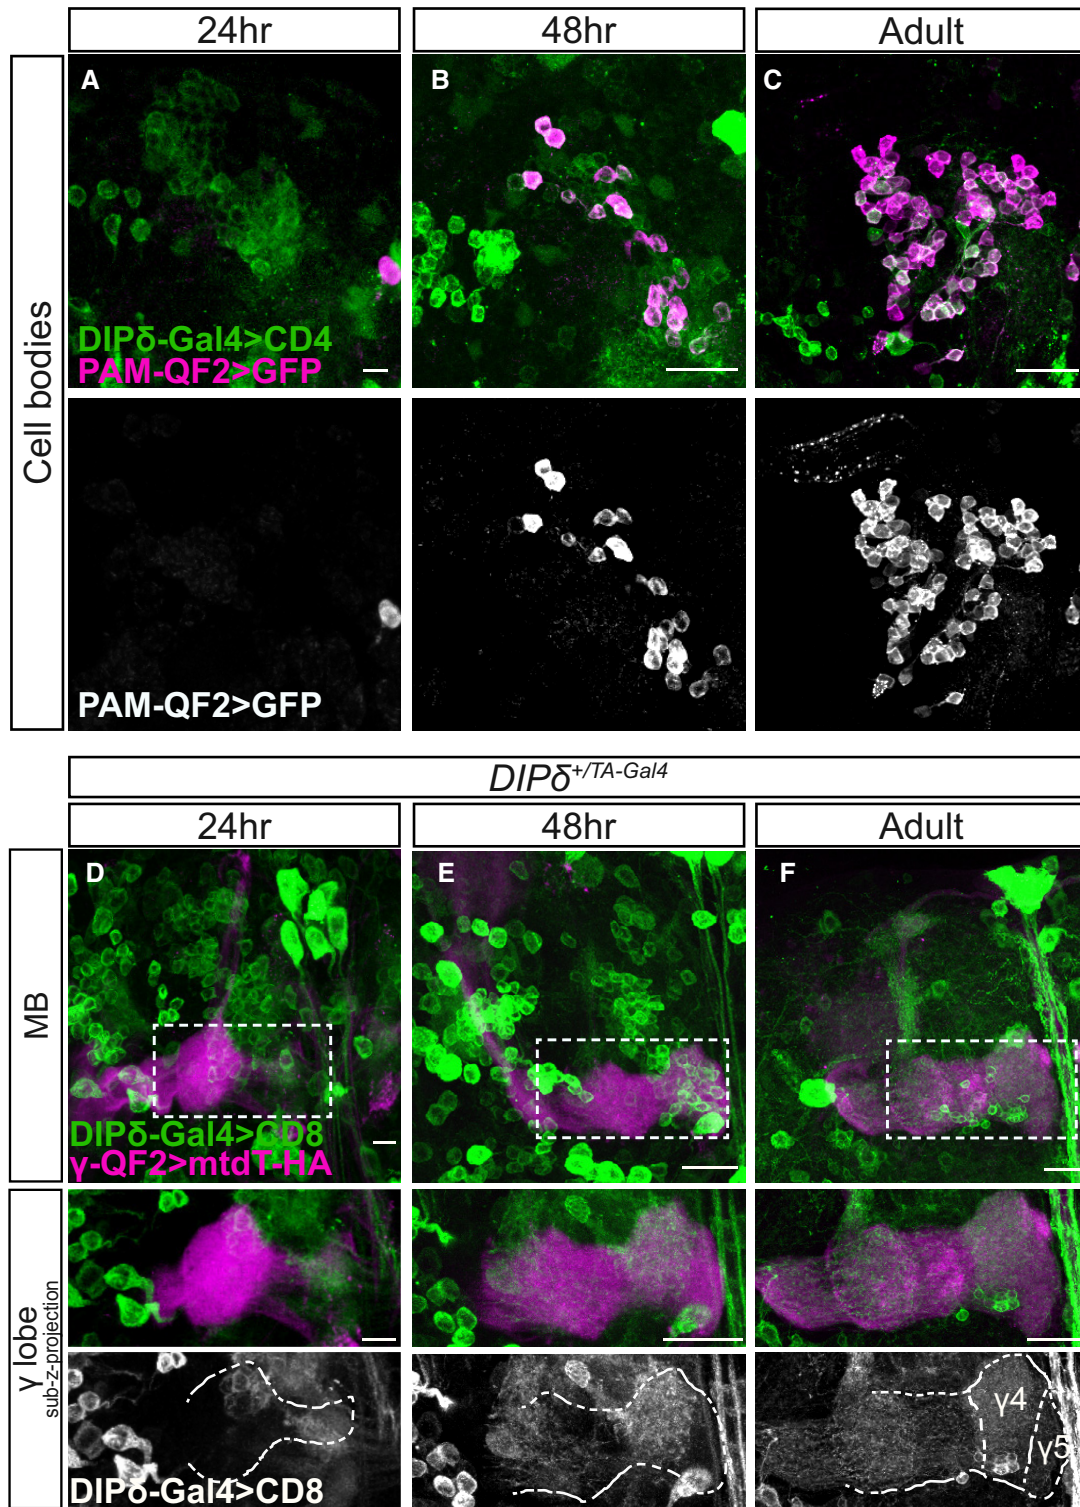

Figure EV4.

**Figure EV5. Phenotypic analysis of PAM-DAN and MBON innervation of the MB  $\gamma$ -lobe in *Dpr12* mutant brains, related to Fig 7.**

A–I (A, B, D, E, G, H) Left: Detailed analysis of the confocal z-projections of *dpr12* heterozygous or homozygous mutant brains that are presented in Fig 7A–F, which express membrane-bound GFP (CD8) driven by: (A–B) R10G03-Gal4 is used to label PAM-DANs innervating the  $\gamma$ 4 compartment (PAM-DAN- $\gamma$ 4); (D–E) R48H11-Gal4 is used to label PAM-DANs innervating the  $\gamma$ 5 compartment (PAM-DAN- $\gamma$ 5); (G–H) R18H09-Gal4 is used to label the MBON $\gamma$ 4 >  $\gamma$ 1 $\gamma$ 2 which innervates the  $\gamma$ 4 zone (MBON- $\gamma$ 4). Right: YZ projections along the indicated lines in  $\gamma$ 3 (orange) and  $\gamma$ 4 or  $\gamma$ 5 (blue) compartments. (C, F, I) Top: Cell body numbers of the indicated neurons in *dpr12* heterozygous and homozygous brains. Bottom: Summary of innervation destinations. Unknown means stereotypic projections to unidentifiable domains.

Data information: Green is CD8-GFP, magenta is FasII, and grayscale single channels are shown as indicated. Asterisks mark missing innervation and arrows mark innervations outside the  $\gamma$  lobe. Scale bar is 20  $\mu$ m in (A–B, D–E, G–H) and 10  $\mu$ m in (A'–B', D'–E', G'–H').



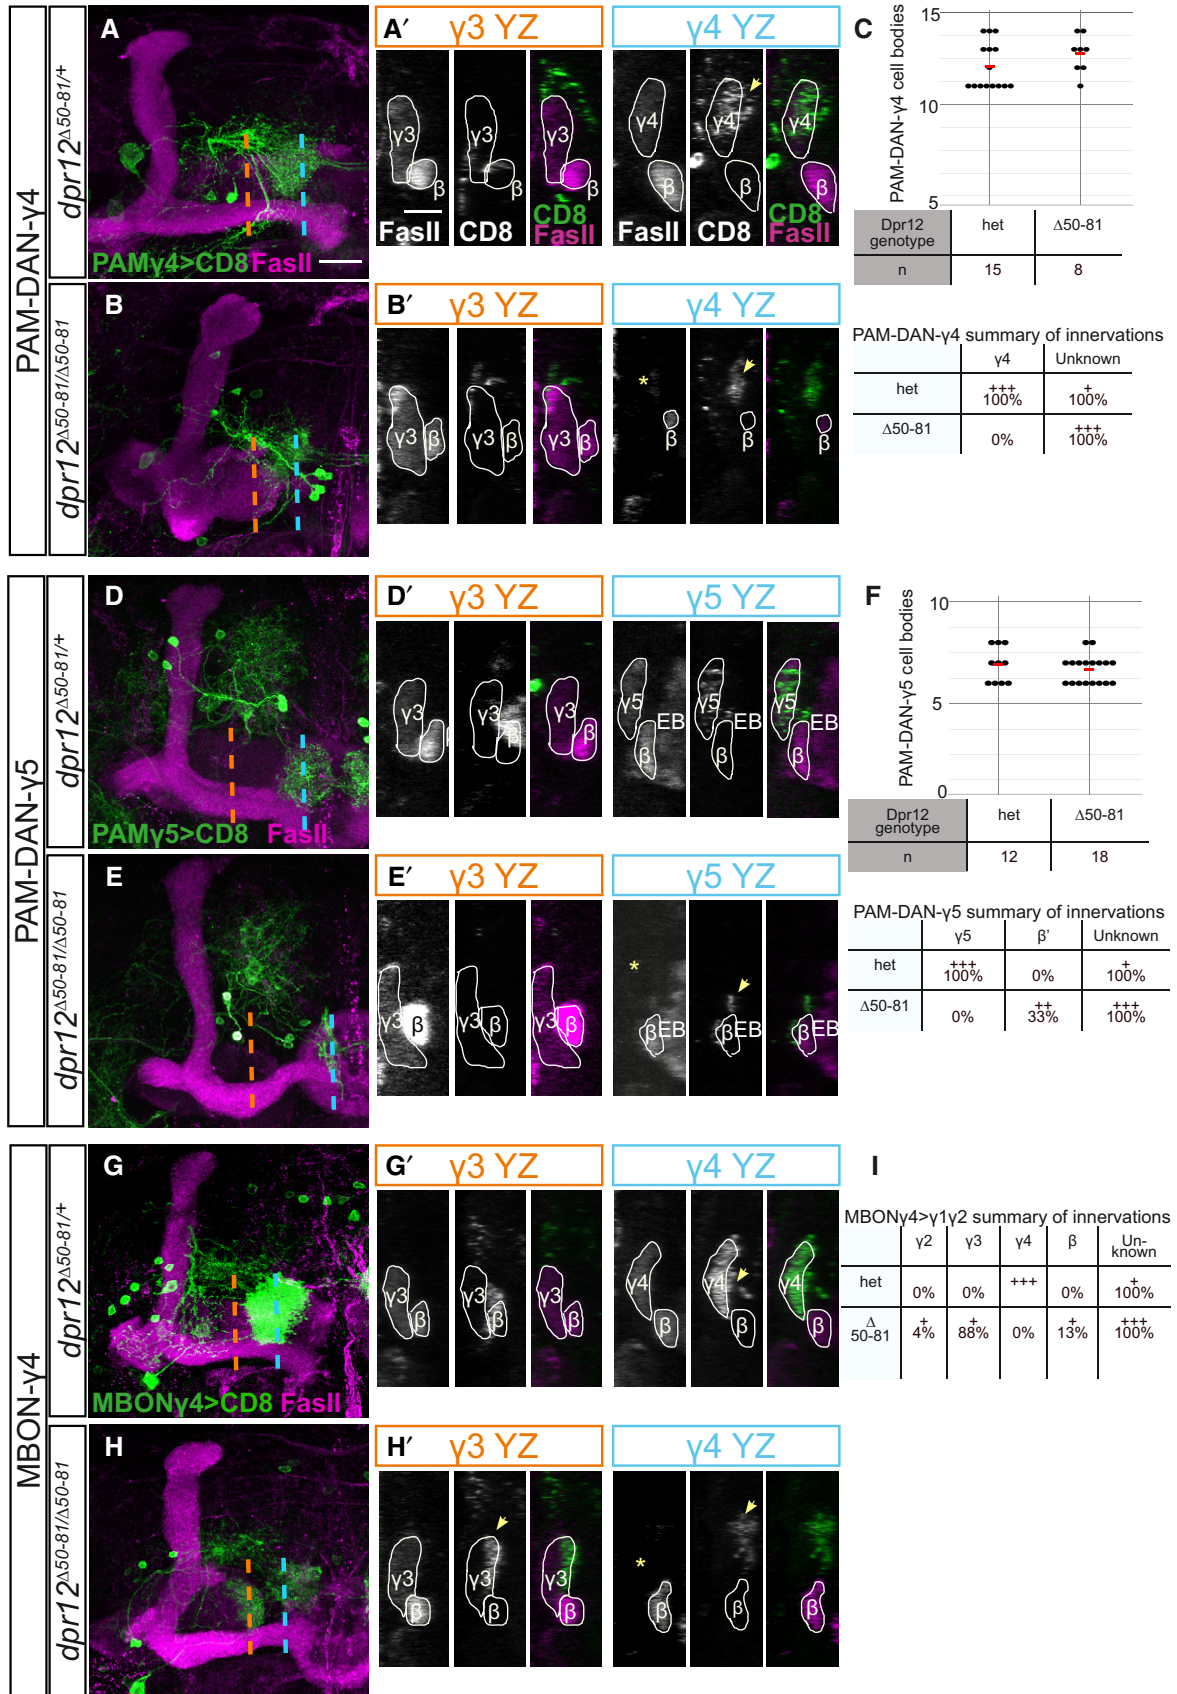

Figure EV5.

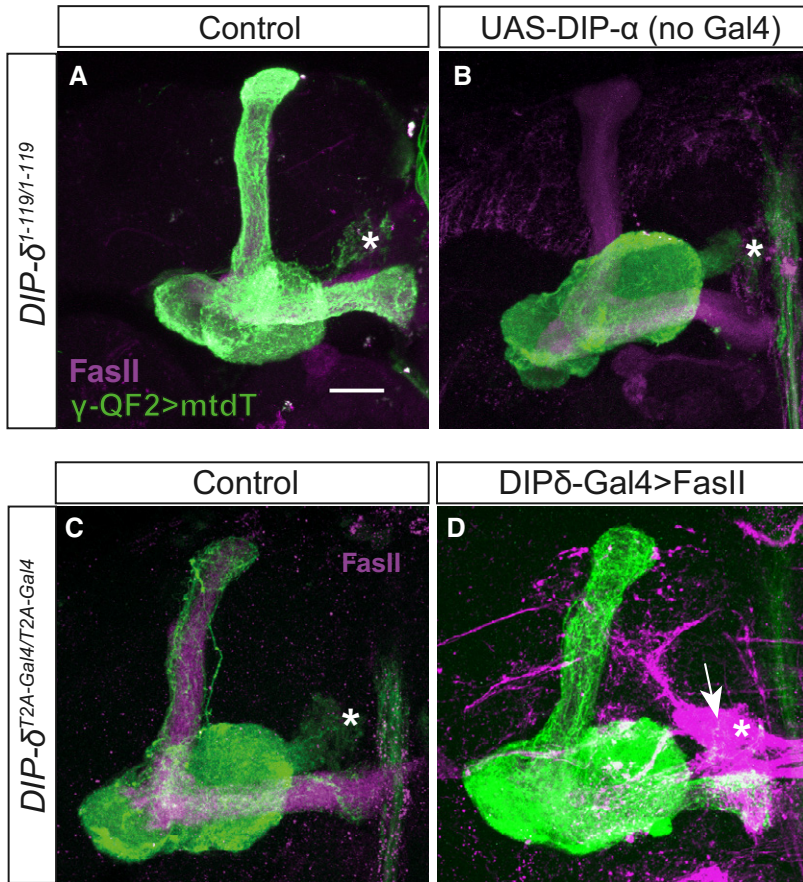

**Figure EV6. UAS-DIP- $\alpha$  function is Gal4-dependent; FasII overexpression fails to suppress the *DIP- $\delta$*  mutant phenotype, related to Fig 8.**

A, B Confocal z-projections of *DIP- $\delta$ <sup>1-119</sup>* homozygous mutant brains, in which  $\gamma$ -KCs are labeled by membrane-bound tandem tomato (mtdT-HA; green) driven by R71G10-QF2 ( $\gamma$ -QF2), that either contain (B) or do not contain (A) a UAS-DIP- $\alpha$  transgene.  
 C, D Confocal z-projections of *DIP- $\delta$ <sup>T2A-Gal4/T2A-Gal4</sup>* homozygous mutant brains, in which  $\gamma$ -KCs are labeled by mtdT-HA (green) driven by  $\gamma$ -QF2, that either express (D) or do not express (C) a UAS-FasII transgene driven by DIP- $\delta$ -Gal4.

Data information: Magenta is FasII; arrow in (D) indicates FasII accumulation in DIP- $\delta$ <sup>+</sup> PAM-DANs. Asterisks mark the distal edge of the lobe. Scale bar is 20  $\mu$ m.
